# Supplementary material
Source: PubMed Central journal article supplement (PMC5831455)
Supplement: jamasurg-152-638-s001.pdf [file jamasurg-152-638-s001.pdf]

## Supplementary Online Content

Borab ZM, Lanni MA, Tecce MG, Pannucci CJ, Fischer JP. Use of computerized clinical decision support systems to prevent venous thromboembolism in surgical patients: a systematic review and meta-analysis. *JAMA Surg*. Published online March 15, 2017. doi:10.1001/jamasurg.2017.0131

**eTable 1.** Search Strategies per Database

**eTable 2.** MOOSE Checklist

**eTable 3.** NOS Score for Observational Studies

**eFigure 1.** Summary of Risk of Bias Assessment

**eFigure 2.** Forest Plot Comparing Overall Rate of Ordering VTE Prophylaxis Using CCDSSs vs Routine Care

**eFigure 3.** Forest Plot Comparing Rate of Ordering VTE Prophylaxis Using CDSSs vs Routine Care Subgrouped by CDSSs That Featured Order Autopopulation and Those That Recommended but Could Not Autopopulate the Order

This supplementary material has been provided by the authors to give readers additional information about their work.

## Supplemental Online Material

eTable 1- Search Strategies Per Database

eFigure 1- Risk of bias summary chart for included studies.

eTable 2- MOOSE Checklist

eFigure 2- Forest plot comparing overall rate of ordering VTE prophylaxis using CCDSSs versus routine care.

eFigure 3- Forest plot comparing rate of ordering VTE prophylaxis using CCDSSs versus routine care subgrouped by CCDSSs that featured order autopopulation and those that recommended but could not autopopulate the order.

eTable 3- NOS score for observational studies

**eTable 1. Search Strategies per database**

|                    |                                                                                                                                                                                                                                                                                                                                                                           |
|--------------------|---------------------------------------------------------------------------------------------------------------------------------------------------------------------------------------------------------------------------------------------------------------------------------------------------------------------------------------------------------------------------|
| Pubmed             | ((("Decision Support Systems, Clinical"[Mesh] OR "computerized clinical decision support systems" OR "Medical Records Systems, Computerized"[Mesh]) AND ("Risk Factors"[Mesh] OR "Risk Adjustment"[Mesh] OR "Risk Management"[Mesh] OR "Risk Assessment"[Mesh])) AND ("Venous Thromboembolism/prevention and control"[Mesh] OR "Anticoagulants"[Mesh]))                   |
| Ovid               | ("Decision Support Systems, Clinical" OR "computerized clinical decision support systems" OR "Medical Records Systems, Computerized") AND ("Risk Factors" OR "Risk Adjustment"OR "Risk Management"OR "Risk Assessment") AND ("Postoperative Complications" OR "Surgical Procedures, Operative" OR "Treatment Outcome") AND ("Venous Thromboembolism" OR "Anticoagulants") |
| Embase             | decision support systems/ and surgery/ and (risk factor or risk management or risk adjustment) and (postoperative complication or reoperation or treatment outcome)- remove abstracts                                                                                                                                                                                     |
| Scopus             | ("Decision Support Systems, Clinical" OR "computerized clinical decision support systems" OR "Medical Records Systems, Computerized") AND (thromboembolism OR Venous thrombosis)                                                                                                                                                                                          |
| Cochrane           | venous thromboembolism and prophylaxis                                                                                                                                                                                                                                                                                                                                    |
| Clinicaltrials.gov | clinical decision support and venous thromboembolism                                                                                                                                                                                                                                                                                                                      |

### Risk of Bias Summary

|                 | Comparability (sampling bias) | Hawthorne Effect (trial effect bias) | Outcome Assessment (detection Bias) | Incomplete outcome data (attrition bias) | Selective reporting (reporting bias) |
|-----------------|-------------------------------|--------------------------------------|-------------------------------------|------------------------------------------|--------------------------------------|
| Durieux 2000    | -                             | +                                    | +                                   | +                                        | +                                    |
| Fuzinatto 2013  | -                             | +                                    | +                                   | +                                        | +                                    |
| Galanter 2010   | +                             | -                                    | +                                   | +                                        | -                                    |
| Haut 2012       | -                             | -                                    | +                                   | +                                        | +                                    |
| Janus 2011      | +                             | +                                    | +                                   | -                                        | +                                    |
| Lecumberri 2008 | +                             | +                                    | +                                   | +                                        | -                                    |
| Mitchell 2012   | +                             | -                                    | +                                   | +                                        | -                                    |
| Mosen 2004      | +                             | -                                    | +                                   | +                                        | -                                    |
| Novis 2010      | -                             | -                                    | +                                   | +                                        | -                                    |
| Streiff 2012    | +                             | -                                    | +                                   | +                                        | -                                    |
| Umscheid 2012   | +                             | -                                    | +                                   | +                                        | -                                    |

**eFigure 1. Summary of risk of bias assessment.**

## VTE Prophylaxis Ordering

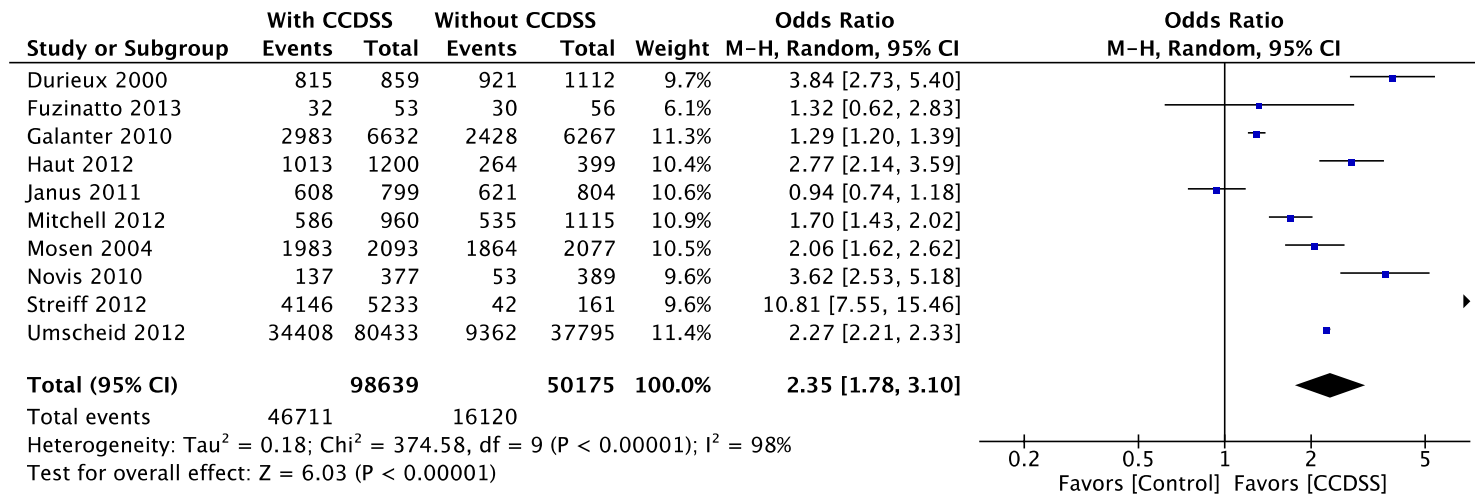

eFigure 2- Forest plot comparing overall rate of ordering VTE prophylaxis using CCDSSs versus routine care. A Mantel-Haenszel random effects model was used to conduct the meta-analysis and odds ratios are presented with 95% confidence intervals.

### VTE Prophylaxis Ordering Subgrouped By Feature

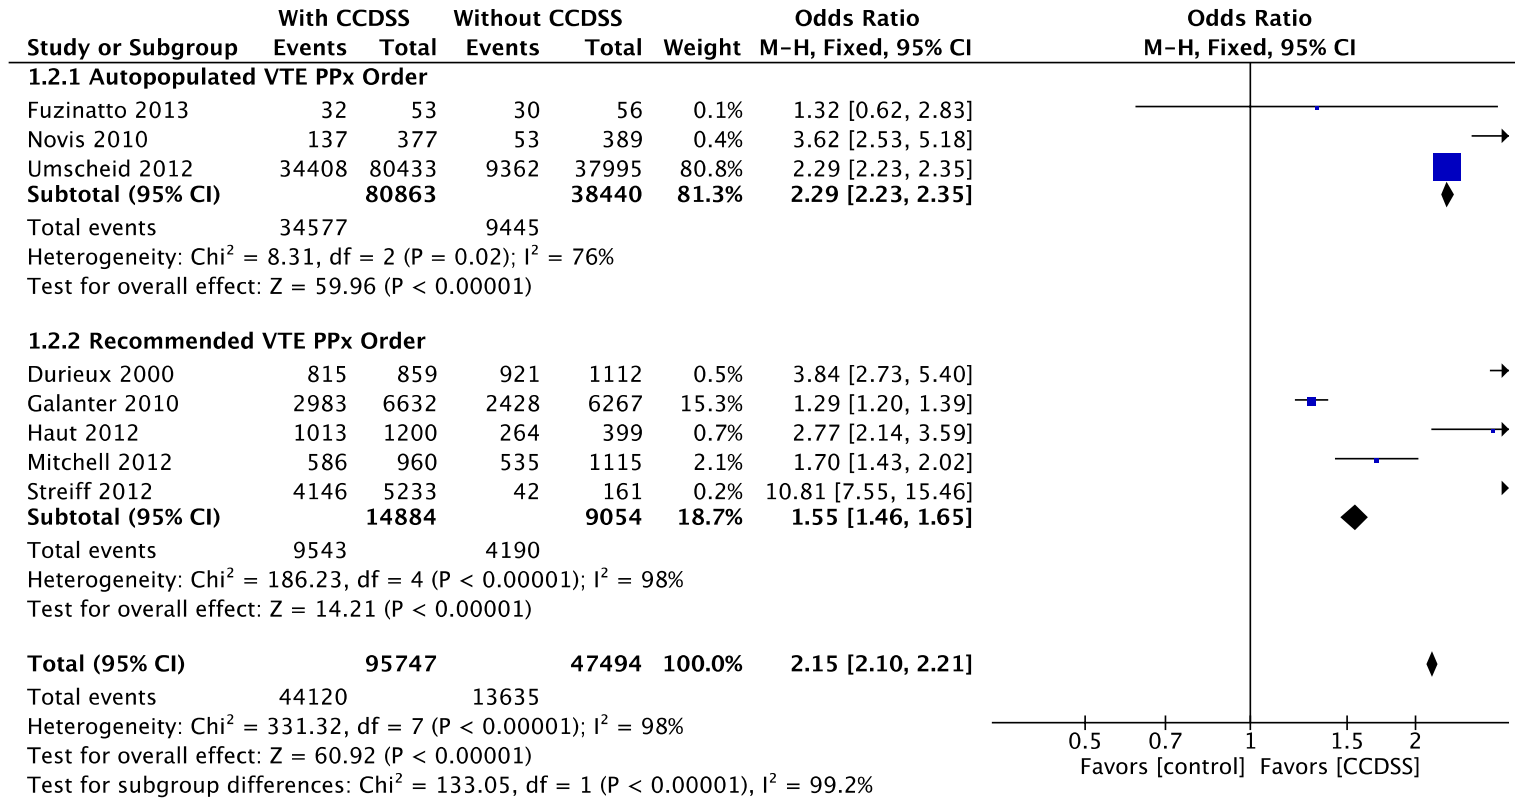

eFigure 3- Forest plot comparing rate of ordering VTE prophylaxis using CDSSs versus routine care subgrouped by CDSSs that featured order autopopulation and those that recommended but could not autopopulate the order. A Mantel-Haenszel fixed effects model was used to conduct the meta-analysis and odds ratios are presented with 95% confidence intervals.

| <b>eTable 2- MOOSE Checklist</b>            |                                                                                                                |                            |
|---------------------------------------------|----------------------------------------------------------------------------------------------------------------|----------------------------|
| <b>Item No</b>                              | <b>Recommendation</b>                                                                                          | <b>Reported on Page No</b> |
| Reporting of background should include      |                                                                                                                |                            |
| 1                                           | Problem definition                                                                                             | 3-4                        |
| 2                                           | Hypothesis statement                                                                                           | 4                          |
| 3                                           | Description of study outcome(s)                                                                                | 4                          |
| 4                                           | Type of exposure or intervention used                                                                          | 4                          |
| 5                                           | Type of study designs used                                                                                     | 4                          |
| 6                                           | Study population                                                                                               | 4                          |
| Reporting of search strategy should include |                                                                                                                |                            |
| 7                                           | Qualifications of searchers (eg, librarians and investigators)                                                 | 1                          |
| 8                                           | Search strategy, including time period included in the synthesis and key words                                 | 5                          |
| 9                                           | Effort to include all available studies, including contact with authors                                        | 5                          |
| 10                                          | Databases and registries searched                                                                              | 5                          |
| 11                                          | Search software used, name and version, including special features used (eg, explosion)                        | eTable 1                   |
| 12                                          | Use of hand searching (eg, reference lists of obtained articles)                                               | 5                          |
| 13                                          | List of citations located and those excluded, including justification                                          | figure 1                   |
| 14                                          | Method of addressing articles published in languages other than English                                        | 5                          |
| 15                                          | Method of handling abstracts and unpublished studies                                                           | 5-6                        |
| 16                                          | Description of any contact with authors                                                                        | 5-6                        |
| Reporting of methods should include         |                                                                                                                |                            |
| 17                                          | Description of relevance or appropriateness of studies assembled for assessing the hypothesis to be tested     | 5-6                        |
| 18                                          | Rationale for the selection and coding of data (eg, sound clinical principles or convenience)                  | 5-6                        |
| 19                                          | Documentation of how data were classified and coded (eg, multiple raters, blinding and interrater reliability) | 7                          |
| 20                                          | Assessment of confounding (eg, comparability of cases and controls in studies where appropriate)               | x                          |

|                                     |                                                                                                                                                                                                                                                                              |                         |
|-------------------------------------|------------------------------------------------------------------------------------------------------------------------------------------------------------------------------------------------------------------------------------------------------------------------------|-------------------------|
| 21                                  | Assessment of study quality, including blinding of quality assessors, stratification or regression on possible predictors of study results                                                                                                                                   | 5-6                     |
| 22                                  | Assessment of heterogeneity                                                                                                                                                                                                                                                  | 6-7                     |
| 23                                  | Description of statistical methods (eg, complete description of fixed or random effects models, justification of whether the chosen models account for predictors of study results, dose-response models, or cumulative meta-analysis) in sufficient detail to be replicated | 6-7                     |
| 24                                  | Provision of appropriate tables and graphics                                                                                                                                                                                                                                 | x                       |
| Reporting of results should include |                                                                                                                                                                                                                                                                              |                         |
| 25                                  | Graphic summarizing individual study estimates and overall estimate                                                                                                                                                                                                          | eFigure 2,3<br>Figure 2 |
| 26                                  | Table giving descriptive information for each study included                                                                                                                                                                                                                 | table 1                 |
| 27                                  | Results of sensitivity testing (eg, subgroup analysis)                                                                                                                                                                                                                       | 9                       |
| 28                                  | Indication of statistical uncertainty of findings                                                                                                                                                                                                                            | x                       |

| Item No                                 | Recommendation                                                                                                            | Reported on Page No  |
|-----------------------------------------|---------------------------------------------------------------------------------------------------------------------------|----------------------|
| Reporting of discussion should include  |                                                                                                                           |                      |
| 29                                      | Quantitative assessment of bias (eg, publication bias)                                                                    | eFigure2,<br>eTable2 |
| 30                                      | Justification for exclusion (eg, exclusion of non-English language citations)                                             | x                    |
| 31                                      | Assessment of quality of included studies                                                                                 | 11-13                |
| Reporting of conclusions should include |                                                                                                                           |                      |
| 32                                      | Consideration of alternative explanations for observed results                                                            | 10-12                |
| 33                                      | Generalization of the conclusions (ie, appropriate for the data presented and within the domain of the literature review) | 13                   |
| 34                                      | Guidelines for future research                                                                                            | 13                   |



**eTable 3. NOS score for observational studies**

|                 | Selection                            |                                 |                           |                                                            | Comparability                                         | Outcome                   |                                                  |                                  |       |
|-----------------|--------------------------------------|---------------------------------|---------------------------|------------------------------------------------------------|-------------------------------------------------------|---------------------------|--------------------------------------------------|----------------------------------|-------|
|                 | Representativeness of exposed cohort | Selection of non-exposed cohort | Ascertainment of exposure | Demonstration that outcome was not KNOWN at start of study | Comparability of groups on the basis of analysis      | Assessment of outcome     | Was follow up long enough for outcomes to occur? | Adequacy of follow up of cohorts | Total |
|                 | Variety of surgical patients         | Variety of surgical patients    | EHR                       | Stated in article                                          | Controlled for patient VTE risk factor between groups | blinded or record linkage | 3 months                                         | 90-100% complete follow up       |       |
| Durieux 2000    | 0                                    | 0                               | 1                         | 1                                                          | 1                                                     | 1                         | 0                                                | 1                                | 5     |
| Fuzinato 2013   | 0                                    | 0                               | 1                         | 1                                                          | 1                                                     | 1                         | 0                                                | 1                                | 5     |
| Galanter 2010   | 1                                    | 1                               | 1                         | 1                                                          | 1                                                     | 1                         | 0                                                | 1                                | 7     |
| Haut 2012       | 0                                    | 0                               | 1                         | 1                                                          | 1                                                     | 1                         | 0                                                | 1                                | 5     |
| Janus 2011      | 1                                    | 0                               | 1                         | 1                                                          | 0                                                     | 1                         | 1                                                | 1                                | 7     |
| Lecumberri 2008 | 1                                    | 1                               | 1                         | 1                                                          | 0                                                     | 0                         | 1                                                | 1                                | 7     |
| Mitchel 2012    | 1                                    | 1                               | 1                         | 1                                                          | 1                                                     | 1                         | 1                                                | 1                                | 8     |
| Mosen 2004      | 1                                    | 1                               | 1                         | 1                                                          | 1                                                     | 1                         | 1                                                | 1                                | 8     |
| Novis 2010      | 0                                    | 0                               | 1                         | 1                                                          | 1                                                     | 1                         | 1                                                | 1                                | 6     |
| Streff 2012     | 1                                    | 1                               | 1                         | 1                                                          | 1                                                     | 1                         | 1                                                | 1                                | 8     |
| Umscheid 2012   | 1                                    | 1                               | 1                         | 1                                                          | 1                                                     | 1                         | 0                                                | 1                                | 7     |
